# Supplementary material for: A Structured Multimodal Program for Improving The Pediatric Discharge Summaries At The University Teaching Hospital
Source: Research Square preprint supplement (doi:10.21203/rs.3.rs-1006900/v1), 2021-10-28
Supplement: Supplementary file 2 [file 78f58b56ac27ef521643e74b.docx]

Institute Logo, Name, and address

DISCHARGE SUMMARY

CATEGORY : GENERAL/ JAY

| **NAME** |  | **HOSPITAL NO.** |  |
| --- | --- | --- | --- |
| **AGE/SEX:** |  | **ADMISSION NO.** |  |
| **ADDRESS:** |  | **WARD** |  |
|  |  | **DATE OF ADMISSION** |  |
| **Mob No.:** |  | **DATE OF DISCHARGE** |  |
| **D.O.B. :** |  | **WEIGHT ON ADMISSION** |  |
| **INFORMANT** |  | **WEIGHT ON DISCHARGE** |  |

| **CONSULTANTS:** | **SPECIALITY : PEDIATRICS**  **RESIDENTS:** |
| --- | --- |

| **DIAGNOSIS:** |
| --- |

**Brief history, pertinent physical data :**

Patient was brought to paediatric OPD with complains of:

- N/H/O fever, cough, cold

**Treatment history and past history:** patient was taken to

**Birth history:** single / Female / full term / Spontaneous Vaginal delivery / BW- 2.5 kg / hospital delivery / baby cried immediately after birth / No history of NICU admission/ No any significant perinatal history

**Immunization history**: completed upto current age (according to his mother). No immunization records are available. BCG scar is present.

**Developmental history**:

Studying in standard

Development normal according to age

No history suggestive of delayed developmental milestones

**Family history:**

No H/O similar illness in family

No H/O contact TB

| **Anthropometry** : | **Observed** | **Expected** | **Percentile** |
| --- | --- | --- | --- |
| **Weight (kg)** |  |  |  |
| **Height(cm)** |  |  |  |
| **Body mass index (kg/m2)**  **Head circumference (cm)** |  |  |  |

**Vitals on examination :**

| - **T** – Normal - **PR**– 72/min - **RR** –18/min - **Spo2 :**- 100% - **BP -**110/70 mmhg - Pallor present. No icterus, no cyanosis, no lymphadenopathy, no edema. | **Systemic examination**   - **RS**– B/L air entry equal, no adventitious sound,no visible distress - **CVS**– S1S2 normal, no murmur - **P/A –** soft ,non tender. Liver- not palpable, spleen- not palpable - **CNS** – active alert , both eyes pupil reacting to light . |
| --- | --- |

**Treatment summary :**

| IV Fluids  Inj PCM  Inj Pantoprazole  Inj Ondansetron |  |
| --- | --- |

.

**Condition on Discharge :**

| - **T** – Normal - **PR** – 78/min - **RR** – 18/min - **Spo2 :**- 100% - **BP:-** - Pallor present.No Icterus, no cyanosis, no lymphadenopathy, no edema. | **Systemic examination**   - **RS**– B/Lair entry equal, no adventitious sound - **CVS**– S1S2normal, no murmur - **P/A– S**oft ,non tender. Liver- not palpable, spleen- not palpable - **CNS**– Active alert , both eyes pupil reacting to light . |
| --- | --- |

**Advice on discharge :**

- Tab/ Syp paracetamol as and when required for fever
- Tab/Syp ondansetron (4mg) as and when required for vomiting
- Tab pantoprazole(40 mg) as and when required
- Take plenty of fluids
- Danger signs explained for immediate followup

**Follow up:** follow up in pediatrics opd on /09/2019 (Monday and Thursday )

Bring immunization card on follow up

**Consultant’s signature: _______________________________**

I have understood the instructions given about the medication dosage and post-discharge care.

_____________________________

(Patient / relative signature)

**Contact urgently if patient becomes/develops vomiting/ convulsions/ ear bleeding/ high grade fever or unconscious.**
