# Supplementary material for: A Structured Multimodal Program for Improving The Pediatric Discharge Summaries At The University Teaching Hospital
Source: Research Square preprint supplement (doi:10.21203/rs.3.rs-1006900/v1), 2021-10-28
Supplement: Supplementary file 3 [file a1c21ff0da9a7975fffe11af.docx]

Institute Logo, Name, and address

DISCHARGE SUMMARY

CATEGORY : GENERAL/ JAY/CASHLESS

| **NAME** |  | **HOSPITAL NO.** |  |
| --- | --- | --- | --- |
| **AGE/SEX:** |  | **ADMISSION NO.** |  |
| **ADDRESS:** |  | **WARD** |  |
|  |  | **DATE OF ADMISSION** |  |
| **Mob No.:** |  | **DATE OF DISCHARGE** |  |
| **D.O.B. :** |  | **WEIGHT ON ADMISSION** |  |
| **INFORMANT** |  | **WEIGHT ON DISCHARGE** |  |

| **CONSULTANTS:** | **SPECIALITY : PEDIATRICS**  **RESIDENTS:** |
| --- | --- |

| **DIAGNOSIS:** |
| --- |

**Brief history, pertinent physical data :**

Patient was brought to Pediatric OPD/ Emergency department with complains of:

- No H/O fever, cough and cold, vomiting, loose stools, abdominal pain, rash or any skin lesions
- No any significant history suggestive of fall or trauma

**Treatment History:** patient was taken to Private/ Government hospital nearby for the following complaints for which patient was given oral / IV medications and was

**Past History:** No any significant past medical or surgical illness requiring hospitalization

**Birth history:** Single / Male/Female / Full term / Spontaneous Vaginal delivery / Lower segment Caeserean section () / BW- 2.5 kg / hospital delivery / Cried immediately after birth / No history of NICU admission/ No any significant perinatal history

**Immunization history**: completed upto years of age (according to mother).No immunization records are available. BCG scar is present.

**Developmental history**:

Studying in standard

Development - Normal according to age

No history suggestive of delayed developmental milestones

Gross motor:

Fine motor:

Social and adaptive:

Language:

**Menstrual History:**

Menarche started at the age of year.

Cycle of days / regular cycle / no abnormal bleeding

**Dietary History:**

**SMR Staging:**

**Family history:**

No H/O similar illness in family (Asthama/DM)

No H/O contact TB

| **Anthropometry** : | **Observed** | **Expected** | **Percentile** |
| --- | --- | --- | --- |
| **Weight (kg)** | kg | kg | Centile |
| **Height(cm)** | cm | cm | Centile |
| **Body mass index (kg/m2)**  **Head circumference (cm)** |  |  |  |

**Weight for age:**

**Height for age:**

**MUAC:**

**Examination On Admission:**

| - **T** – Normal - **PR**– 72/min - **RR** –18/min - **Spo2 :**- 100% on Room Air - **BP -**1 mmhg - Pallor present. No icterus, no cyanosis, no lymphadenopathy, no edema. | **Systemic examination**   - **RS**– B/L air entry equal, no adventitious sound, no visible distress - **CVS**– S1S2 normal, no murmur - **P/A –** soft ,non tender, no guarding. Liver- not palpable, spleen- not palpable - **CNS** – Active alert , both eyes pupil reacting to light . - **GCS-** E4 V5 M6 |
| --- | --- |

**Hospital Course:**

**Treatment summary :**

| IV Fluids  Inj PCM  Inj Pantoprazole  Inj Ondansetron |  |
| --- | --- |

**Condition on Discharge :**

| - **T** – Normal - **PR** – 78/min - **RR** – 18/min - **Spo2 :**- 100% on room air - **BP:-** - Pallor present.No Icterus, no cyanosis, no lymphadenopathy, no edema. | **Systemic examination**   - **RS**– B/L air entry equal, no adventitious sound, no visible respiratory distress - **CVS**– S1S2 normal, no murmur - **P/A–** Soft ,non tender, no guarding. Liver- not palpable, spleen- not palpable - **CNS**– Active alert , both eyes pupil reacting to light - **GCS-** E4 V5 M6 |
| --- | --- |

**Advice on discharge :**

- દિવસ માં ૧/ ૨/૩ વાર આપવી - સવાર / બપ્પોર / સાંજ
- Tab/ Syp Paracetamol જયારે તાવ આવે ત્યારે આપવી
- હજુ બીજા ૨ દિવસ સુધી આપવી
- Tab/Syp Ondansetron (4mg) જયારે ઊલટી / ઉબકા આવે ત્યારે આપવી (ભૂખ્યા પેટે દવા લેવી)
- પુષ્કળ પ્રમાણ માં પ્રવાહી /હળવો ખોરાક લેવો
- દવાઓ નિયમિત ધોરણ એ સમઝાવ્યા પ્રમાણે લેવી
- સમઝાવ્યા પ્રમાણે ઘરે કસરત ચાલુ રાખવી
- તમારા બાળક ને ખેંચ ની બીમારી હોવવા ના કારણ એ તમારા બાળક ને આગ વળી જગ્યા ઓ થી , ઊંડા પાણી થી અને ખુબ જ ઊંચાઈ વળી જગ્યા ઓ એ જવાનું ટાળો

**Follow up:** બાળકો ની ઓ.પી.ડી **નો ૧૫૩**  માં ફરી બતાવવાની તારીખ **/10/2020** (સોમવાર / મંગળવાર /બુધવાર / ગુરુવાર / શુક્રવાર/ શનિવાર )

સમઝાવ્યા પ્રમાણે જુના બધા જ અગત્ય ના કાગળો જેમ કે રજા નું કાર્ડ , રસીકરણ નું કાર્ડ અને અન્ય કોઈ પણ જરૂરી કાગળ સમઝાવ્યા પ્રમાણે લઈને આવવું

**Consultant’s signature: _______________________________**

**મને અહિયાં થી લખેલી દવા ઓ કઈ રીતે આપવી અને ઘરે શું કાળજી રાખવી તેની સંપૂર્ણ માહિતી બાળકો ના ડૉક્ટર દ્વારા મારી ભાષા માં આપેલ છે**

_____________________________

(Patient / relative signature)

**સમઝાવેલા ગંભીર લક્ષણો જેમ કે : સત્તત ઉલ્ટી / ખેંચો / ખુબ વધુ તાવ / ખુબ જ અશક્તિ / બેભાન અવસ્થા / લાલાશ પડતા ચાઠાં પડી જાય અથવા તમારું બાળક સત્તત રડયા કરે / ધાવણ અથવા ખોરાક લેવાનો બંધ કરી દે કે ઓછો કરી દે તો તરત જ ફરી બતાવવા આવું**

**LABORATORY REPORTS**
